# Supplementary material for: An Anti-BCMA RNA Aptamer for miRNA Intracellular Delivery
Source: PubMed Central journal article supplement — Mol Ther Nucleic Acids. 2019 Oct 28;18:981–90. doi: 10.1016/j.omtn.2019.10.021 (PMC6889555; doi:10.1016/j.omtn.2019.10.021), 2019-10-28
Supplement: mmc1.pdf [file mmc1.pdf]

**OMTN, Volume 18**

## **Supplemental Information**

### **An Anti-BCMA RNA Aptamer**

### **for miRNA Intracellular Delivery**

**Silvia Catuogno, Maria Teresa Di Martino, Silvia Nuzzo, Carla Lucia Esposito, Pierfrancesco Tassone, and Vittorio de Franciscis**

| Round Number | RNA pool (pmoles)                                                                                          | Number of cells at the day before incubation | Washes after selection | Counter-selection steps | Incubation time (min)                                                    | High salt washings |
|--------------|------------------------------------------------------------------------------------------------------------|----------------------------------------------|------------------------|-------------------------|--------------------------------------------------------------------------|--------------------|
| I            | 600                                                                                                        | 2,67 x 10 <sup>6</sup>                       | 1                      | 1                       | 30' selection<br>30' counter-selection                                   | no                 |
| II           | 600                                                                                                        | 2,67 x 10 <sup>6</sup>                       | 2                      | 1                       | 30' selection<br>30' counter-selection                                   | no                 |
| III          | 600                                                                                                        | 2,67 x 10 <sup>6</sup>                       | 2                      | 1                       | 30' selection<br>30' counter-selection                                   | no                 |
| IV           | 600                                                                                                        | 2,67 x 10 <sup>6</sup>                       | 3                      | 1                       | 30' selection<br>30' counter-selection                                   | no                 |
| V            | 600                                                                                                        | 0,9 x 10 <sup>6</sup>                        | 3                      | 1                       | 30' selection<br>30' counter-selection                                   | no                 |
| VI           | 600                                                                                                        | 0,7 x 10 <sup>6</sup>                        | 4                      | 1                       | 30' selection<br>30' counter-selection                                   | no                 |
| VII          | 600                                                                                                        | 0,7 x 10 <sup>6</sup>                        | 5                      | 2                       | 30' selection<br>30' counter-selection<br>30' counter-selection          | no                 |
| VIII         | 600                                                                                                        | 0,32 x 10 <sup>6</sup>                       | 5                      | 2                       | 15' selection<br>15' counter-selection<br>15' counter-selection          | no                 |
| IX           | 600 + polyinosinic acid 0.1 ug/ul (during the selection step)                                              | 0,32 x 10 <sup>6</sup>                       | 5                      | 2                       | 15' selection<br>15' counter-selection<br>15' counter-selection          | yes                |
| X            | 600 + polyinosinic acid 0.1 ug/ul (15' pretreatment before selection and during the selection step)        | 0,32 x 10 <sup>6</sup>                       | 6                      | 2                       | 15' selection<br>15' counter-selection<br>15' counter-selection          | yes                |
| XI           | <b>600 + polyinosinic acid 0.1 ug/ul (30' pretreatment before selection and during the selection step)</b> | <b>0,32 x 10<sup>6</sup></b>                 | <b>6</b>               | <b>2</b>                | <b>15' selection<br/>15' counter-selection<br/>15' counter-selection</b> | <b>yes</b>         |

**Supplementary Table 1 Cell-internalizing SELEX conditions**

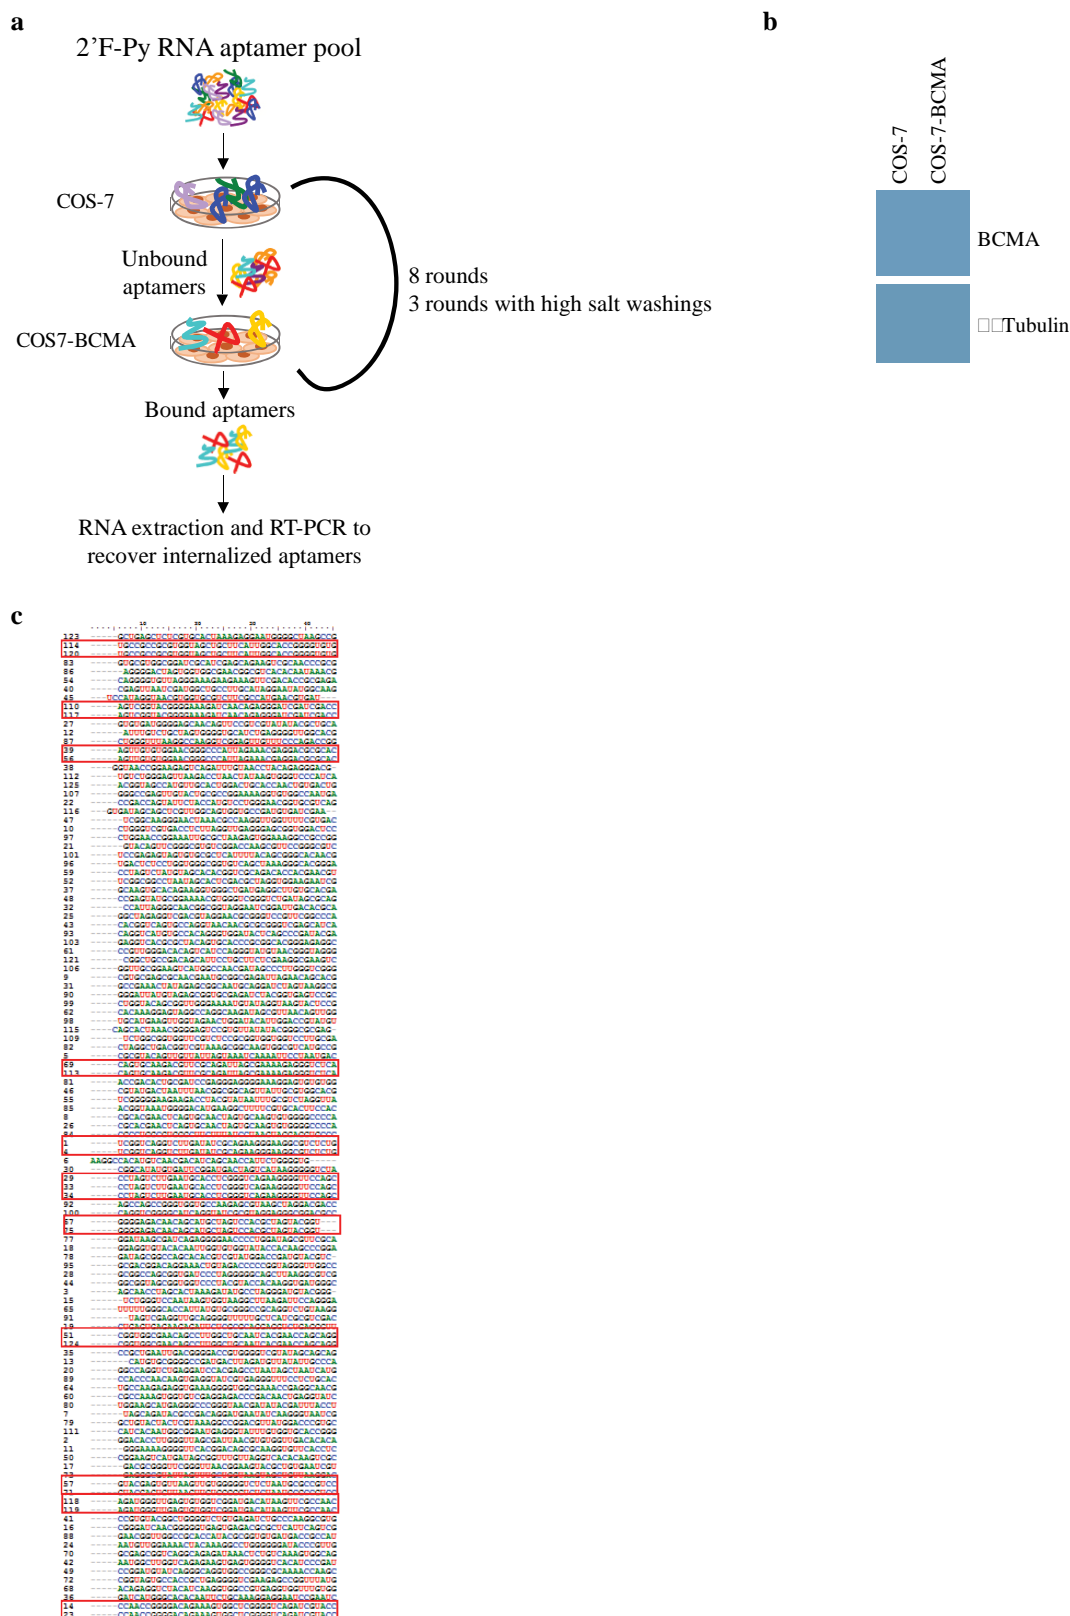

**Supplementary Figure 1 Cell-internalizing SELEX.** (a) Scheme of cell-internalizing SELEX protocol. We performed eight rounds in which the 2'F-Py RNA aptamer pool was: incubated with parental COS-7 cells (counter-selection); unbound aptamers were recovered and incubated with COS7-BCMA cells (positive selection); bound aptamers were recovered by RNA extraction and RT-PCR. In three additional rounds, downstream the positive selection step three high salt washings were performed to remove cell surface-bound

aptamers. Internalized aptamers were recovered by RNA extraction and RT-PCR. **(b)** Western blot analysis of COS-7 parental cells compared to COS-7 transiently transfected with BCMA. **(c)** Multiple Alignment of aptamer identified following cloning of the last SELEX rounds and sequencing. Multiple Sequence Alignment (ClustalW2) tool of EMBL-EBI was used.

**a**

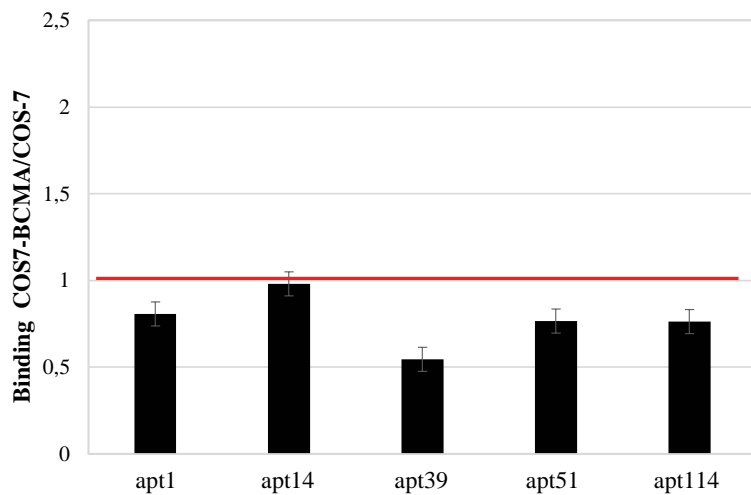

**b**

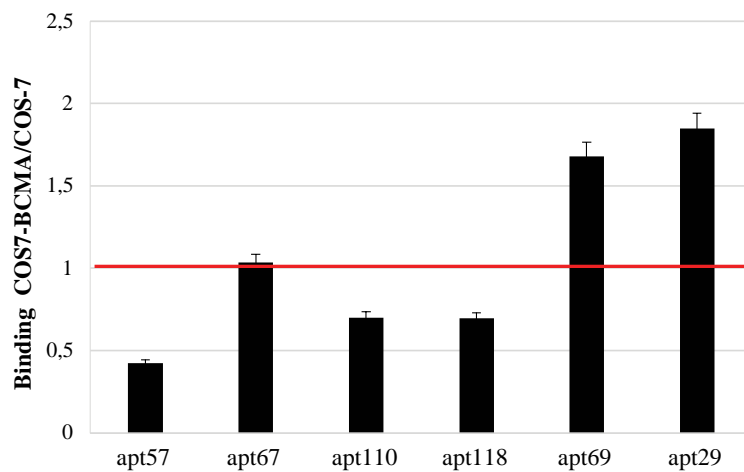

**Supplementary Figure 2 Binding activity analysis.** (a,b) Binding of 11 RNA aptamers obtained by SELEX procedure. Aptamers (100 nM) were incubated with COS-7 parental cells or with COS7-BCMA cells for 30 min at 37°C. Binding values were measured by RT-qPCR and here reported as fold increase (COS7-BCMA/COS-7).

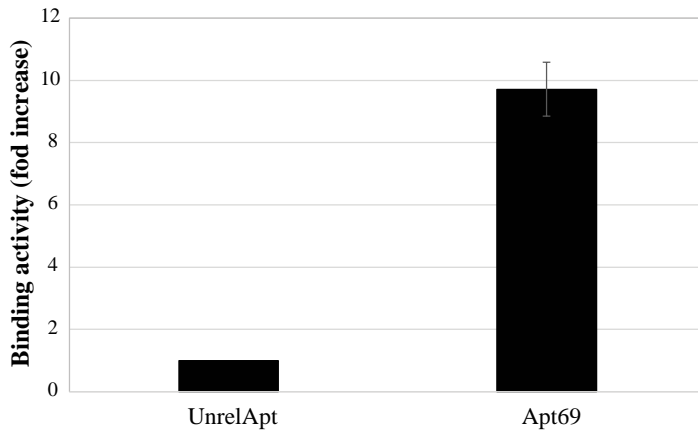

**Supplementary Figure 3 Binding activity of apt69 compared to a control aptamer.** Apt69 or control aptamer (UnrelApt) were incubated with COS7-BCMA cells for 30 min at 37°C. Binding values were measured by RT-qPCR and here reported as fold increase.

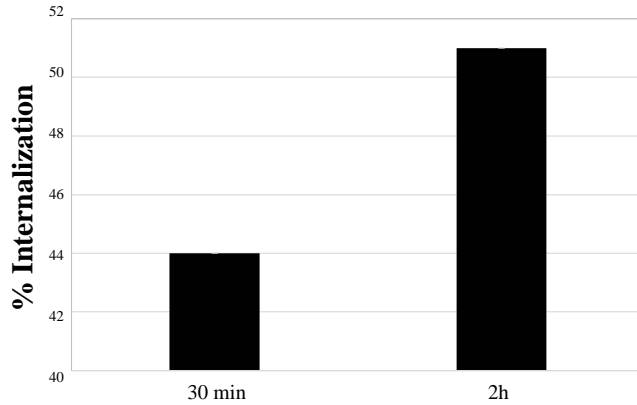

**Supplementary Figure 4 Internalization of apt69.T.** Apt69.T was incubated with U266 cells for 30 min or 2 hours at 37°C. Cells were recovered following three washings with DPBS (total) or with DPBS 0,5 M NaCl (internalized) in order to remove aptamer on the cell surface. The quantities of total and internalized aptamer was evaluated by RT-qPCR and reported as percentage of internalized aptamer. Bars show the mean  $\pm$  SEM values.
